# Supplementary material for: Dating the Age of the SIV Lineages That Gave Rise to HIV-1 and HIV-2
Source: PLOS journal article supplement (doi:10.1371/journal.pcbi.1000377), 2009-04-30

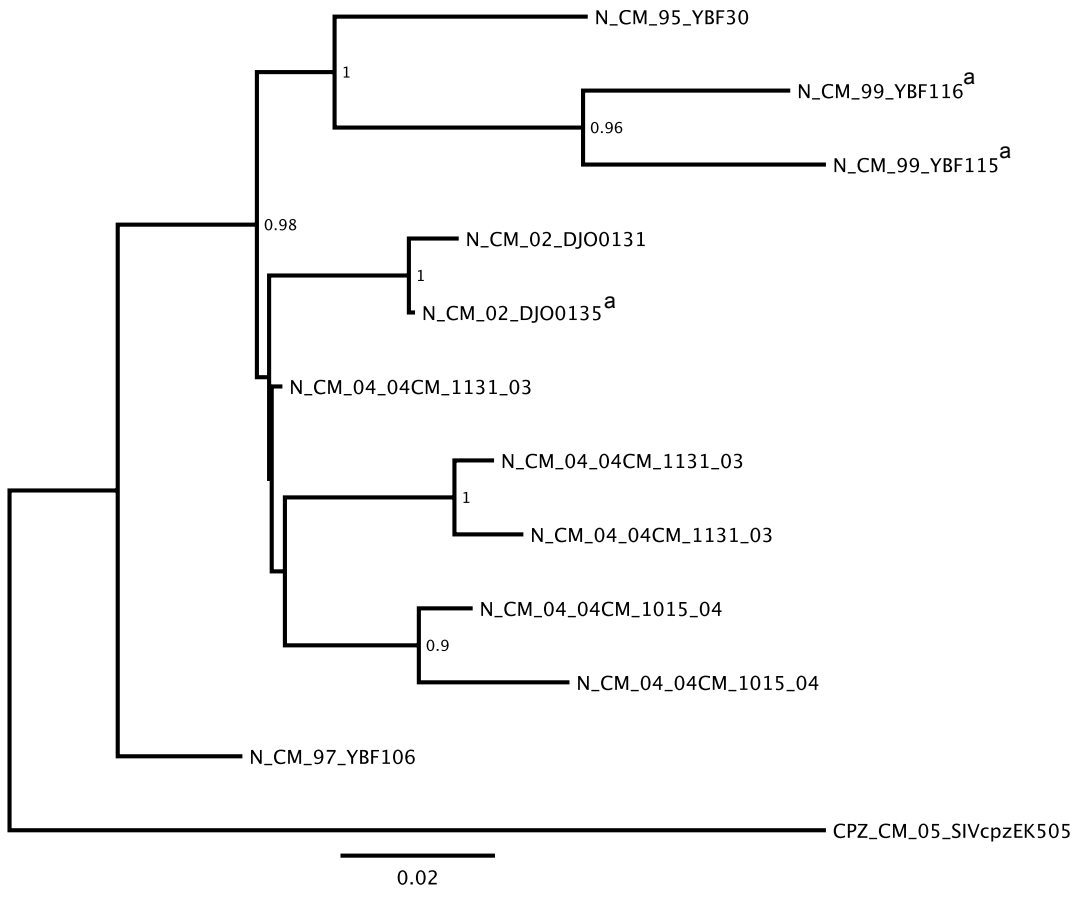

Supplement: S9 (10.1371/journal.pcbi.1000377.s009) [file journal.pcbi.1000377.s009]
